# Supplementary material for: The SEQC2 epigenomics quality control (EpiQC) study
Source: PubMed Central journal article supplement (PMC8650396; doi:10.1186/s13059-021-02529-2), 2021-12-06
Supplement: 13059_2021_2529_MOESM2_ESM.pdf [file 13059_2021_2529_MOESM2_ESM.pdf]

## Supplementary Tables

| Step         | Software    | No. Reads | Mean Time (min) | Standard Dev (min) |
|--------------|-------------|-----------|-----------------|--------------------|
| Alignment    | Bismark     | 1M        | 19.33           | 1.74               |
|              | BitmapperBS | 1M        | 11.98           | 3.76               |
|              | BSseeker2   | 1M        | 65.76           | 3.5                |
|              | bwa-meth    | 1M        | 29.92           | 6.17               |
| Meth Calling | Bismark     | 1M        | 2.86            | 0.9                |
|              | BitmapperBS | 1M        | 1.97            | 0.17               |
|              | BSseeker2   | 1M        | 39.87           | 17.4               |
|              | bwa-meth    | 1M        | 0.24            | 0.07               |

**Supplementary Table 1.** Timing comparison of each alignment and methylation estimation software. Ten permutations of each software were run, and the mean times are reported, as well as the standard deviation per software.

| <b>Insert Size</b>       | <b>HG001</b> | <b>HG002</b> | <b>HG003</b> | <b>HG004</b> | <b>HG005</b> | <b>HG006</b> | <b>HG007</b> | <b>mean</b> | <b>stDev</b> |
|--------------------------|--------------|--------------|--------------|--------------|--------------|--------------|--------------|-------------|--------------|
| EMSeqLAB01               | 297.1        | 299.6        | 349.75       | 288.95       | 300.53       | 298.23       | 330.3        | 309.21      | 22.11        |
| EMSeqLAB02               | 325.8        | 327.95       | 326.35       | 328.15       | 320.2        | 325.47       | 358.57       | 330.35      | 12.72        |
| MethylSeq                | 249.77       | 250.93       | 250.88       | 247.13       | 249.67       | 256.45       | 247.78       | 250.37      | 3.04         |
| SPLAT                    | 214.83       | 217.81       | 220.71       | 223.74       | 220.34       | 223.85       | 224.18       | 220.78      | 3.52         |
| TruSeq                   | 218.58       | 217.68       | 219.88       | 216.77       | 214.67       | 217.58       | 215.78       | 217.28      | 1.74         |
| TrueMethylOX             | 207.7        | 203.83       | 209.95       | 205.93       | 211.8        | 211.5        | 204.4        | 207.87      | 3.3          |
| TrueMethylBS             | 228.6        | 220.67       | 226.5        | 224.2        | 224.73       | 227.4        | 219          | 224.44      | 3.52         |
| EPIC                     | 225.7        | 227.45       | 225.65       | 227          | 229.65       | 229.7        | 227.7        | 227.55      | 1.65         |
| <b>Primary Mapping %</b> | <b>HG001</b> | <b>HG002</b> | <b>HG003</b> | <b>HG004</b> | <b>HG005</b> | <b>HG006</b> | <b>HG007</b> | <b>mean</b> | <b>stDev</b> |
| EMSeqLAB01               | 97.48        | 97.63        | 97.37        | 97.87        | 97.14        | 97.36        | 97.32        | 97.45       | 0.24         |
| EMSeqLAB02               | 94.89        | 93.27        | 94.09        | 94.46        | 91.97        | 94.27        | 93.33        | 93.75       | 0.98         |
| MethylSeq                | 98.4         | 98.36        | 98.32        | 98.41        | 98.16        | 98.36        | 98.39        | 98.34       | 0.09         |
| SPLAT                    | 96.44        | 97.18        | 96.92        | 97.21        | 97.07        | 97.48        | 97.24        | 97.08       | 0.33         |
| TruSeq                   | 95.33        | 95.45        | 95.23        | 95.58        | 95.51        | 95.55        | 95.37        | 95.43       | 0.13         |
| TrueMethylOX             | 85.95        | 84.53        | 87.43        | 87.01        | 85.64        | 87.15        | 85.11        | 86.12       | 1.11         |
| TrueMethylBS             | 85.17        | 83.5         | 86.66        | 86.06        | 84.73        | 86.4         | 84.2         | 85.25       | 1.18         |
| EPIC                     | 98.27        | 98.31        | 98.37        | 98.12        | 98.28        | 98.27        | 98.23        | 98.26       | 0.08         |
| <b>Duplicate %</b>       | <b>HG001</b> | <b>HG002</b> | <b>HG003</b> | <b>HG004</b> | <b>HG005</b> | <b>HG006</b> | <b>HG007</b> | <b>mean</b> | <b>stDev</b> |
| EMSeqLAB01               | 9.28         | 9.13         | 9.15         | 8.65         | 11.28        | 12.1         | 10.6         | 10.03       | 1.3          |
| EMSeqLAB02               | 23.61        | 25.03        | 23.97        | 23.37        | 27.08        | 23.68        | 25.11        | 24.55       | 1.31         |
| MethylSeq                | 13.75        | 13.77        | 13.84        | 14.42        | 13.56        | 14.44        | 13.32        | 13.87       | 0.42         |
| SPLAT                    | 12.37        | 12.02        | 11.63        | 10.9         | 11.88        | 10.86        | 13.28        | 11.85       | 0.84         |
| TruSeq                   | 21.73        | 22.53        | 27.26        | 24.35        | 25.86        | 31.57        | 25.77        | 25.58       | 3.28         |
| TrueMethylOX             | 21.24        | 21.66        | 18.19        | 19.48        | 20.86        | 19.56        | 21.21        | 20.31       | 1.26         |
| TrueMethylBS             | 21.29        | 21.95        | 17.89        | 18.72        | 20.15        | 18.66        | 20.22        | 19.84       | 1.48         |
| EPIC                     | 66.42        | 67.43        | 62.9         | 63.92        | 69.21        | 69.5         | 68.24        | 66.8        | 2.56         |
| <b>Dinucleotide Bias</b> | <b>HG001</b> | <b>HG002</b> | <b>HG003</b> | <b>HG004</b> | <b>HG005</b> | <b>HG006</b> | <b>HG007</b> | <b>mean</b> | <b>stDev</b> |
| EMSeqLAB01               | 3.77         | 2.97         | 3.36         | 2.98         | 2.7          | 2.69         | 2.99         | 3.07        | 0.38         |
| EMSeqLAB02               | 1.12         | 0.84         | 1.16         | 0.98         | 1.14         | 1.11         | 1.1          | 1.06        | 0.11         |
| EPIC                     | 26.58        | 26.74        | 26.59        | 26.69        | 26.43        | 26.36        | 26.93        | 26.62       | 0.19         |
| MethylSeq                | 3.4          | 3.71         | 3.43         | 3.41         | 3.47         | 3.53         | 3.52         | 3.5         | 0.11         |
| SPLAT                    | 6.95         | 7.58         | 5.55         | 6.36         | 6.66         | 6.24         | 5.8          | 6.45        | 0.69         |
| TrueMethylBS             | 3.43         | 3.44         | 3.8          | 3.3          | 3.73         | 3.61         | 3.99         | 3.61        | 0.24         |
| TrueMethylOX             | 3.3          | 3.71         | 3.64         | 3.71         | 3.72         | 3.72         | 3.71         | 3.64        | 0.16         |
| TruSeq                   | 24.66        | 23.09        | 24.1         | 23.69        | 23.13        | 23.36        | 23.83        | 23.69       | 0.56         |
| <b>Useable Bases %</b>   | <b>HG001</b> | <b>HG002</b> | <b>HG003</b> | <b>HG004</b> | <b>HG005</b> | <b>HG006</b> | <b>HG007</b> | <b>mean</b> | <b>stDev</b> |
| EMSeqLAB01               | 90.21        | 90.35        | 90.26        | 90.71        | 87.88        | 87.61        | 88.89        | 89.42       | 1.27         |
| EMSeqLAB02               | 76.01        | 74.6         | 75.51        | 76.16        | 72.62        | 76.01        | 51.56        | 71.78       | 9            |
| EPIC                     | 33.2         | 32.21        | 36.69        | 35.67        | 30.46        | 30.17        | 31.4         | 32.83       | 2.52         |
| MethylSeq                | 74.46        | 74.5         | 74.55        | 73.8         | 74.77        | 74.01        | 74.9         | 74.43       | 0.39         |
| SPLAT                    | 78.9         | 80.62        | 81.19        | 83           | 81.43        | 82.79        | 81.4         | 81.33       | 1.38         |
| TrueMethylBS             | 70.21        | 66.6         | 71.08        | 70.13        | 70.03        | 71.69        | 71.97        | 70.24       | 1.78         |
| TrueMethylOX             | 67.53        | 66.49        | 68.45        | 68.5         | 68.07        | 68.66        | 66.78        | 67.78       | 0.87         |
| TruSeq                   | 62.68        | 62.98        | 60.23        | 61.19        | 60.29        | 62.58        | 51.03        | 60.14       | 4.17         |

**Supplementary Table 2** Read and mapping statistics for all cell lines. stDev = standard deviation. Values shown are averages across replicates for each library. Usable bases are calculated as the total mapped bases as a percentage of the total number of bases sequenced.

| Number of Common Sites for all Assays                | 2298846 | Assay  |            |          |       |            |        |
|------------------------------------------------------|---------|--------|------------|----------|-------|------------|--------|
|                                                      |         |        |            |          |       |            |        |
| Common Sites with 5X for all Assays (C5X Sites)      | 1928536 |        |            |          |       |            |        |
| DM Sites in 3 or more platforms on C5X sites (DM4+)  | 29802   | EM-Seq | Methyl-Seq | Nanopore | SPLAT | TrueMethyl | TruSeq |
| Percentage of all common sites with 5X Coverage      |         | 97%    | 96%        | 100%     | 96%   | 97%        | 86%    |
| Number of DM Sites for this assay on C5X Sites (DMA) |         | 74054  | 67621      | 26868    | 76591 | 59516      | 87170  |
| Percentage DMA unique to this platform               |         | 26%    | 26%        | 17%      | 29%   | 22%        | 42%    |
| Percentage of DMA sites in DM4+                      |         | 36%    | 38%        | 56%      | 35%   | 42%        | 27%    |
| Percentage of DM4+ in DMA sites                      |         | 90%    | 86%        | 51%      | 89%   | 85%        | 79%    |

**Supplementary Table 3** Statistics for differentially methylated sites across assays.

|                                                   | EMSeq | MethylSeq | Nanopore | SPLAT | TrueMethyl | TruSeq |
|---------------------------------------------------|-------|-----------|----------|-------|------------|--------|
| Number of DMAs mapped to array                    | 3296  | 2964      | 1027     | 3228  | 2750       | 4267   |
| Number DMAs with  PMD  > .2                       | 3279  | 2942      | 1026     | 3092  | 2743       | 3404   |
| % DMAs with  PMD  >.2 and array  PMD  > .2        | 55.5% | 58.8%     | 67.0%    | 57.3% | 60.0%      | 49.6%  |
| Number Hypermethylated in HG005-HG007             | 2505  | 2358      | 721      | 2368  | 2092       | 2432   |
| % Hypermethylated DMAs with array PMD > .2        | 57.0% | 60.3%     | 69.1%    | 58.6% | 62.0%      | 52.4%  |
| Number Hypomethylated in HG005-HG007              | 774   | 584       | 305      | 724   | 651        | 972    |
| % Hypomethylated DMAs with array PMD < -.2        | 50.4% | 53.1%     | 62.0%    | 53.0% | 53.8%      | 42.7%  |
| % of sites with array  PMD >.2 identified as DMAs | 44.0% | 41.9%     | 16.6%    | 43.5% | 39.8%      | 42.7%  |

**Supplementary Table 4** Concordance between assays of differentially methylated sites per assay (DMAs) with respect to microarray sites. PMD = Percent Methylation Difference, calculated as an absolute value.

| TargetID    | African American | Caucasian American | Asian American | Asian-Caucasian | FOR      | Chr. | Position (HG19) | Position (HG38) | Gene           | Feature           | Variance | meQTL   | EMSeq   | MethylSeq | Nanopore | SPRAT   | TrueMethyl | TruSeq  | Illumina |         |
|-------------|------------------|--------------------|----------------|-----------------|----------|------|-----------------|-----------------|----------------|-------------------|----------|---------|---------|-----------|----------|---------|------------|---------|----------|---------|
| cg1590012   | 0.84             | 0.85               | 0.62           | -0.23           | 2.73E-29 | 1    | 1265354         | 1329974         | TAS1R3         | Promoter          | AS       | yes     | -0.7629 | -0.6364   | -0.3709  | -0.6693 | -0.6275    | -0.399  | -0.2610  |         |
| cg23611477  | 0.89             | 0.81               | 0.75           | -0.06           | 4.11E-11 | 1    | 1644835         | 1713396         | CDK11A,CDK11B  | Body/Promoter     | AF       | yes     | NA      | 0.4202    | 0.0614   | NA      | NA         | NA      | 0.0538   |         |
| cg00649623  | 0.28             | 0.15               | 0.14           | -0.01           | 2.78E-17 | 1    | 1653867         | 1724428         | CDK11B,CDK11A  | Promoter          | AF       | no      | -0.0133 | 0.0033    | 0.0132   | 0.0111  | 0.0147     | -0.018  | 0.0057   |         |
| cg03196347  | 0.73             | 0.69               | 0.61           | 0.01            | 1.08E-05 | 1    | 1873803         | 1944364         | NPW4           | Promoter          | AF       | yes     | -0.0497 | -0.1173   | 0.0269   | 0.239   | 0.0752     | -0.04   | -0.0131  |         |
| cg00095688  | 0.62             | 0.66               | 0.52           | -0.14           | 1.24E-05 | 1    | 2003864         | 2072425         | PRKCZ          | Promoter          | AS       | no      | -0.0687 | -0.0143   | -0.0531  | -0.2671 | -0.1292    | -0.0435 | -0.0499  |         |
| cg10761639  | 0.74             | 0.84               | 0.69           | -0.15           | 1.09E-17 | 1    | 2021794         | 2092355         | PRKCZ          | Promoter          | CA       | yes     | 0.0025  | 0.0335    | -0.1343  | -0.0615 | -0.0867    | -0.0412 | -0.0425  |         |
| cg24499605  | 0.45             | 0.32               | 0.43           | 0.11            | 1.76E-14 | 1    | 3142925         | 3226361         | PRDM16         | Body              | CA       | no      | 0.061   | 0.0478    | 0.1165   | 0.0104  | -0.0335    | 0.129   | 0.0281   |         |
| cg14654471  | 0.91             | 0.89               | 0.75           | -0.14           | 3.57E-14 | 1    | 5937169         | 5977109         | NPW4           | Body              | AS       | yes     | -0.0249 | 0.0024    | -0.0453  | 0.0282  | -0.0055    | 0.0189  | -0.1263  |         |
| cg13549940  | 0.64             | 0.81               | 0.81           | 0.00            | 3.29E-12 | 1    | 6390053         | 6329993         | ACOT17         | Body              | AF       | yes     | -0.2485 | -0.1441   | -0.2142  | -0.1369 | -0.0986    | -0.1721 | -0.1473  |         |
| cg23914842  | 0.32             | 0.39               | 0.50           | 0.11            | 1.21E-07 | 1    | 9327170         | 9367111         | HP6D           | 3'UTR             | AS       | yes     | -0.0111 | -0.1046   | -0.0248  | -0.2128 | -0.1016    | -0.0768 | 0.0269   |         |
| cg01017257  | 0.57             | 0.48               | 0.61           | 0.13            | 3.62E-05 | 1    | 15059738        | 14733242        | KIAA1026/KAZN  | Body/Body         | CA       | yes     | 0.7907  | 0.649     | 0.6319   | 0.6125  | 0.5373     | 0.617   | 0.6381   |         |
| cg04850599  | 0.31             | 0.26               | 0.40           | 0.14            | 1.05E-08 | 1    | 17019133        | 16692638        | ESPNP          | Body              | AS       | no      | -0.1329 | NA        | -0.0215  | -0.0769 | NA         | NA      | -0.0618  | -0.0007 |
| cg16588994  | 0.30             | 0.21               | 0.36           | 0.15            | 2.37E-05 | 1    | 21023322        | 2099639         | KIF17          | Body              | CA       | yes     | 0       | 0.0968    | 0        | NA      | -0.0175    | 0.0952  | -0.0276  |         |
| cg18150584  | 0.57             | 0.50               | 0.64           | 0.14            | 6.28E-04 | 1    | 23887816        | 23561326        | ID3            | Promoter          | CA       | no      | 0.083   | 0.0777    | 0.025    | 0.2504  | 0.0816     | 0.2045  | 0.1313   |         |
| cg19276111  | 0.43             | 0.55               | 0.49           | -0.06           | 2.33E-03 | 1    | 24229232        | 23002742        | CNR2           | Promoter          | AF       | no      | -0.0678 | 0.0343    | -0.14    | -0.0744 | -0.1275    | -0.0814 | -0.2102  |         |
| cg20415053  | 0.54             | 0.62               | 0.74           | 0.12            | 1.60E-05 | 1    | 26527928        | 26201437        | CATSPER4       | Body              | AS       | yes     | 0.0882  | 0.0313    | 0.1282   | 0.2414  | 0.0432     | 0.1908  | 0.1243   |         |
| cg02131754  | 0.50             | 0.29               | 0.18           | -0.11           | 3.50E-20 | 1    | 28572799        | 28245788        | NPW4           | AF/3AS            | AS       | yes     | -0.3134 | -0.3608   | -0.2891  | -0.4694 | -0.4177    | -0.4076 | -0.4258  |         |
| cg14718142  | 0.66             | 0.81               | 0.84           | 0.03            | 9.37E-14 | 1    | 32739251        | 32727500        | LCK            | Promoter          | AF/AS    | yes     | 0.0052  | -0.1846   | 0.0507   | 0.0287  | -0.1409    | -0.0417 | -0.0160  |         |
| cg06917450  | 0.29             | 0.27               | 0.54           | 0.27            | 2.31E-16 | 1    | 38156652        | 3769080         | C1orf109       | Promoter          | AS       | yes     | 0.5083  | 0.5241    | 0.4751   | 0.439   | 0.4331     | 0.4884  | 0.5093   |         |
| cg26038582  | 0.69             | 0.57               | 0.64           | 0.07            | 1.73E-02 | 1    | 42384390        | 41917719        | HIVEP3         | Promoter          | CA       | no      | -0.2774 | -0.185    | -0.0661  | 0.021   | -0.234     | 0.111   | -0.2571  |         |
| cg02927682  | 0.37             | 0.40               | 0.49           | 0.09            | 1.73E-03 | 1    | 54844424        | 54378751        | SSBP3          | Body              | AS       | yes     | 0.2756  | 0.1371    | 0.105    | 0.1135  | 0.138      | 0.2669  | 0.2106   |         |
| cg10710651  | 0.48             | 0.37               | 0.50           | 0.13            | 1.06E-04 | 1    | 80968194        | 86502001        | NA             | CA                | yes      | 0.2863  | 0.3508  | 0.346     | 0.323    | 0.2832  | 0.2422     | 0.1701  |          |         |
| cg10631373  | 0.41             | 0.29               | 0.36           | 0.07            | 2.25E-04 | 1    | 89457642        | 88991959        | RBMLX1,CCBL2   | Promoter/Promoter | CA       | yes     | 0.1154  | 0.0038    | 0.0936   | 0.1048  | 0.1652     | -0.0228 | 0.1258   |         |
| cg09480871  | 0.59             | 0.66               | 0.75           | 0.09            | 5.84E-07 | 1    | 101003634       | 100538078       | GP88B          | Promoter          | AF       | yes     | 0.1117  | 0.0329    | -0.0697  | -0.308  | 0.2187     | 0.0961  | 0.0979   |         |
| cg06223162  | 0.30             | 0.38               | 0.53           | 0.15            | 5.65E-08 | 1    | 101003688       | 100538132       | GP88B          | Promoter          | AS       | yes     | 0.1265  | 0.1352    | 0.1149   | 0.132   | 0.0938     | 0.1667  | 0.1493   |         |
| cg25110835  | 0.25             | 0.28               | 0.46           | 0.18            | 1.91E-09 | 1    | 110254828       | 109712206       | GSTM5          | Promoter          | AS       | yes     | -0.4427 | -0.3016   | -0.208   | 0.0643  | -0.0629    | -0.2639 | -0.1339  |         |
| cg02193146  | 0.64             | 0.79               | 0.76           | -0.03           | 6.37E-06 | 1    | 110752257       | 11039635        | NA             | AF                | no       | 0.1198  | 0.0101  | 0.0234    | 0.0045   | -0.0575 | -0.0532    | -0.0285 |          |         |
| cg24833868  | 0.51             | 0.49               | 0.66           | 0.17            | 2.26E-05 | 1    | 14655624        | 147084075       | NA             | AS                | yes      | 0.3135  | 0.5334  | 0.1769    | 0.2033   | 0.1937  | 0.2011     | 0.1400  |          |         |
| cg13502125  | 0.66             | 0.63               | 0.77           | 0.14            | 8.15E-05 | 1    | 147826191       | 148354063       | NA             | AS                | yes      | -0.0759 | -0.1163 | -0.0008   | 0.0058   | -0.0483 | 0.1103     | -0.0616 |          |         |
| cg029339103 | 0.45             | 0.61               | 0.22           | -0.19           | 2.67E-15 | 1    | 154839999       | 154867433       | KCNK9          | Body              | AS       | yes     | -0.5464 | -0.3508   | -0.4614  | -0.541  | -0.4958    | -0.3729 | -0.5728  |         |
| cg23915527  | 0.50             | 0.34               | 0.39           | 0.01            | 2.45E-05 | 1    | 161364797       | 161398997       | NA             | AF                | yes      | 0.2098  | 0.2829  | 0.1048    | 0.1548   | 0.0742  | 0.2871     | 0.2315  |          |         |
| cg12092579  | 0.38             | 0.23               | 0.29           | 0.06            | 2.07E-06 | 1    | 178380975       | 17811840        | RASA2.1        | Body              | AF       | no      | -0.2273 | -0.1367   | -0.0771  | -0.3965 | -0.1321    | -0.3319 | -0.3504  |         |
| cg21868798  | 0.36             | 0.30               | 0.24           | -0.06           | 3.09E-05 | 1    | 199481399       | 199512771       | NA             | AF                | yes      | 0.2709  | 0.1163  | -0.0715   | 0.1599   | 0.1124  | 0.1697     | 0.1315  |          |         |
| cg18222190  | 0.41             | 0.35               | 0.48           | 0.13            | 1.21E-10 | 1    | 204290972       | 204321844       | PLEKH8A6       | Promoter          | CA       | yes     | 0.1774  | 0.1619    | 0.0542   | 0.1112  | 0.1024     | 0.1     | 0.1857   |         |
| cg20240347  | 0.46             | 0.31               | 0.35           | 0.04            | 1.71E-04 | 1    | 204465584       | 204496556       | NA             | AF                | yes      | 0.0271  | 0.0594  | -0.1258   | 0.029    | -0.0769 | 0.1178     | 0.0815  |          |         |
| cg17178900  | 0.28             | 0.50               | 0.24           | -0.26           | 7.76E-10 | 1    | 205818956       | 205849828       | PM2DD1         | Body              | CA       | yes     | -0.4676 | -0.555    | -0.4076  | -0.4483 | -0.5194    | -0.6068 | -0.5164  |         |
| cg26354017  | 0.31             | 0.50               | 0.28           | -0.22           | 1.98E-08 | 1    | 205819088       | 205849960       | PM2DD1         | Promoter          | CA       | yes     | -0.5308 | -0.4969   | -0.4043  | -0.6205 | -0.5653    | -0.6419 | -0.5504  |         |
| cg14159672  | 0.30             | 0.48               | 0.26           | -0.22           | 5.54E-11 | 1    | 205819179       | 205850051       | PM2DD1         | Promoter          | CA       | yes     | -0.6875 | -0.6542   | -0.643   | -0.5692 | -0.6211    | -0.6649 | -0.6134  |         |
| cg14893161  | 0.26             | 0.38               | 0.22           | -0.16           | 2.06E-11 | 1    | 205819251       | 205850123       | PM2DD1         | Promoter          | CA       | yes     | -0.5273 | -0.4899   | -0.5048  | -0.5089 | -0.5619    | -0.4667 | -0.4443  |         |
| cg11869513  | 0.15             | 0.30               | 0.11           | -0.19           | 9.61E-14 | 1    | 205819406       | 205850278       | PM2DD1         | Promoter          | CA       | yes     | -0.1019 | -0.2598   | -0.1607  | -0.1985 | -0.2424    | -0.3878 | -0.2003  |         |
| cg24503407  | 0.25             | 0.43               | 0.21           | -0.22           | 1.11E-13 | 1    | 205819492       | 205850364       | PM2DD1         | Promoter          | CA       | yes     | -0.6528 | -0.5719   | -0.5636  | -0.5621 | -0.6911    | NA      | -0.5648  |         |
| cg07157834  | 0.33             | 0.46               | 0.28           | -0.18           | 2.78E-09 | 1    | 205819609       | 205850481       | PM2DD1         | Promoter          | CA       | yes     | -0.5907 | -0.6364   | -0.4552  | -0.5556 | -0.6012    | -0.3885 | -0.5729  |         |
| cg06939379  | 0.62             | 0.48               | 0.46           | -0.02           | 1.01E-06 | 1    | 232941706       | 232809590       | KIAA1383/MAP10 | Promoter          | AF       | yes     | 0.1941  | 0.1563    | 0.2429   | 0.1696  | 0.3363     | 0.2297  | 0.1942   |         |
| cg00911195  | 0.49             | 0.32               | 0.33           | 0.01            | 7.12E-09 | 1    | 232941775       | 232809629       | KIAA1383/MAP10 | Promoter          | AF       | yes     | 0.0731  | 0.0597    | 0.1212   | 0.071   | 0.0593     | 0.0451  | 0.0826   |         |
| cg02889973  | 0.46             | 0.39               | 0.51           | 0.12            | 3.25E-04 | 1    | 234977572       | 234841825       | NA             | CA                | no       | 0.2911  | 0.332   | 0.1873    | 0.3361   | 0.3551  | 0.1044     | 0.3384  |          |         |
| cg09033006  | 0.40             | 0.46               | 0.22           | -0.24           | 5.74E-19 | 1    | 244517177       | 244358175       | C1orf100       | Promoter          | AS       | yes     | -0.1061 | -0.1756   | -0.1901  | -0.206  | -0.2146    | -0.2098 | -0.2268  |         |
| cg19188911  | 0.61             | 0.70               | 0.75           | 0.05            | 1.01E-07 | 1    | 245541456       | 245378154       | KIF26B         | Body              | AF       | no      | 0.2452  | 0.0935    | 0.2145   | 0.2595  | 0.1635     | 0.0662  | 0.1769   |         |
| cg04134399  | 0.28             | 0.15               | 0.28           | 0.13            | 9.18E-09 | 1    | 246331142       | 246076740       | NPW4           | Body              | CA       | no      | -0.082  | -0.0983   | 0.0651   | 0.066   | -0.0339    | -0.14   | -0.0226  |         |
| cg04798314  | 0.51             | 0.60               | 0.84           | 0.18            | 2.25E-13 | 1    | 246668601       | 246505995       | SMYD3          | Body              | AS       | yes     | -0.0724 | 0.1592    | -0.0085  | -0.0506 | -0.0733    | 0.0421  | -0.0321  |         |
| cg09226051  | 0.42             | 0.40               | 0.30           | -0.10           | 4.03E-03 | 1    | 247611502       | 247448200       | NLRP3          | Body              | AS       | yes     | -0.0714 | -0.154    | -0.017   | -0.1633 | 0.034      | -0.0239 | -0.2073  |         |
| cg15829088  | 0.33             | 0.37               | 0.45           | 0.08            | 3.36E-04 | 1    | 247802935       | 247639333       | NA             | ncRNA promoter    | AS       | yes     | 0.0851  | -0.0693   | 0.0111   | -0.2654 | 0          | -0.0899 | -0.0053  |         |

**Supplementary Table 5** Population Variance agreement. A total of 52 CpGs on chromosome 1 that had been identified as differentially methylated between ethnic populations were annotated and compared for concordance of differential signal between microarray and sequencing data.

fmoles of different forms identified

|                        | Name  | dC    | dmC      | dmC      | dhmC     | dmC/dC   | dhmC/dmC | dhmC/dC |         |
|------------------------|-------|-------|----------|----------|----------|----------|----------|---------|---------|
| Biological Replicate 1 | HG001 | CP 01 | 5680.727 | 156.3333 | 2143.964 | 0.922163 | 2.75%    | 0.04%   | 0.0012% |
|                        |       | CP 01 | 5721.555 | 157.2296 | 2212.077 | 0.966647 | 2.75%    | 0.04%   | 0.0012% |
|                        | HG002 | CP 02 | 6134.437 | 206.1124 | 2915.523 | 1.078334 | 3.36%    | 0.04%   | 0.0012% |
|                        |       | CP 02 | 6097.877 | 206.3662 | 2893.051 | 0.969016 | 3.38%    | 0.03%   | 0.0011% |
|                        | HG003 | CP 03 | 6676.031 | 212.3023 | 2979.854 | 0.756934 | 3.18%    | 0.03%   | 0.0008% |
|                        |       | CP 03 | 6742.651 | 211.5162 | 2948.914 | 0.739288 | 3.14%    | 0.03%   | 0.0008% |
|                        | HG004 | CP 04 | 5223.132 | 188.2691 | 2588.429 | 0.592667 | 3.60%    | 0.02%   | 0.0008% |
|                        |       | CP 04 | 5224.774 | 191.126  | 2560.265 | 0.56839  | 3.66%    | 0.02%   | 0.0008% |
|                        | HG005 | CP 05 | 5487.878 | 192.3814 | 2680.448 | 0.828852 | 3.51%    | 0.03%   | 0.0011% |
|                        |       | CP 05 | 5523.128 | 193.3392 | 2646.98  | 0.784192 | 3.50%    | 0.03%   | 0.0010% |
|                        | HG006 | CP 06 | 5962.204 | 217.7679 | 2979.255 | 0.724408 | 3.65%    | 0.02%   | 0.0009% |
|                        |       | CP 06 | 6041.553 | 217.7672 | 3002.681 | 0.686946 | 3.60%    | 0.02%   | 0.0008% |
|                        | HG007 | CP 07 | 5819.142 | 205.9319 | 2860.277 | 0.884028 | 3.54%    | 0.03%   | 0.0011% |
|                        |       | CP 07 | 5733.883 | 204.7114 | 2814.214 | 0.937631 | 3.57%    | 0.03%   | 0.0012% |
| Biological Replicate 2 | HG001 | CP 08 | 3620.176 | 99.23043 | 1362.303 | 0.646334 | 2.74%    | 0.05%   | 0.0013% |
|                        |       | CP 08 | 3674.493 | 98.73453 | 1356.403 | 0.582917 | 2.69%    | 0.04%   | 0.0012% |
|                        | HG002 | CP 09 | 2835.62  | 91.63515 | 1259.922 | 0.537728 | 3.23%    | 0.04%   | 0.0014% |
|                        |       | CP 09 | 2872.229 | 92.00553 | 1250.31  | 0.520239 | 3.20%    | 0.04%   | 0.0013% |
|                        | HG003 | CP 10 | 2832.307 | 85.18032 | 1167.688 | 0.370097 | 3.01%    | 0.03%   | 0.0010% |
|                        |       | CP 10 | 2864.241 | 86.2764  | 1175.466 | 0.351737 | 3.01%    | 0.03%   | 0.0009% |
|                        | HG004 | CP 11 | 2987.18  | 104.5185 | 1423.736 | 0.548236 | 3.50%    | 0.04%   | 0.0013% |
|                        |       | CP 11 | 2989.671 | 104.0718 | 1431.635 | 0.452427 | 3.48%    | 0.03%   | 0.0011% |
|                        | HG005 | CP 12 | 2999.949 | 102.7485 | 1410.854 | 0.489238 | 3.43%    | 0.03%   | 0.0012% |
|                        |       | CP 12 | 3048.796 | 103.0123 | 1399.723 | 0.54343  | 3.38%    | 0.04%   | 0.0013% |
|                        | HG006 | CP 13 | 3258.307 | 113.3027 | 1535.199 | 0.48512  | 3.48%    | 0.03%   | 0.0011% |
|                        |       | CP 13 | 3199.5   | 111.8209 | 1519.138 | 0.476289 | 3.49%    | 0.03%   | 0.0011% |
|                        | HG007 | CP 14 | 3324.166 | 113.9253 | 1545.66  | 0.634276 | 3.43%    | 0.04%   | 0.0014% |
|                        |       | CP 14 | 3266.074 | 112.9173 | 1530.64  | 0.60005  | 3.46%    | 0.04%   | 0.0014% |
| Blank                  |       | CP 15 | 0        |          | 0.681001 |          |          |         |         |
|                        |       | CP 15 | 0        |          | 0.689081 |          |          |         |         |

**Supplementary Table 6** LC-MS/MS quantification of dC, dmC and dhmC in fmoles from digested genomic DNA (HG001-HG007) samples. For the detection of 5hmC a second higher volume injection was performed. The two dmC quantification values correspond to the two injections. Percentage of 5hmC in these samples is very low and below the limit of detection of the method.
